# Supplementary material for: MdSCL8 as a Negative Regulator Participates in ALA-Induced FLS1 to Promote Flavonol Accumulation in Apples
Source: MDPI journal article supplement (doi:10.3390/ijms23042033), 2022-02-12
Supplement: s1 [file s1]

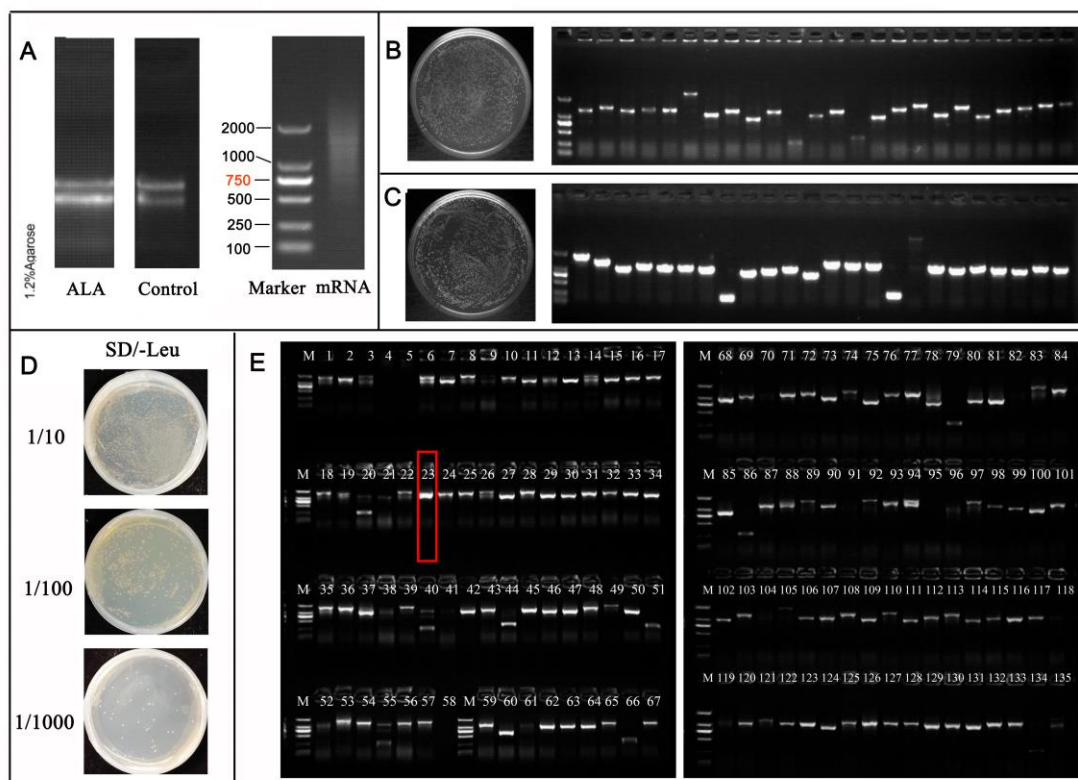

**Figure S1. Construction of apple calli cDNA library, screening of yeast one-hybrid cDNA library and PCR detection of positive colonies.** (A) Agarose gel electrophoresis analysis of total RNA and mRNA extracted from apple calli. Total RNA electrophoresis map, marker, mRNA electrophoresis map. (B) Identification of cDNA primary library capacity and agarose gel electrophoresis analysis of inserted fragment sizes. (C) Identification of cDNA secondary library capacity and agarose gel electrophoresis analysis of inserted fragment size. (D) The screening of yeast one-hybrid cDNA library. 1/10, 1/100, and 1/1000 respectively represent 10 times, 100 times, and 1000 times diluted conversion. (E) Yeast colony PCR detection of yeast from figure D. MdSCL8 is marked with red rectangle.

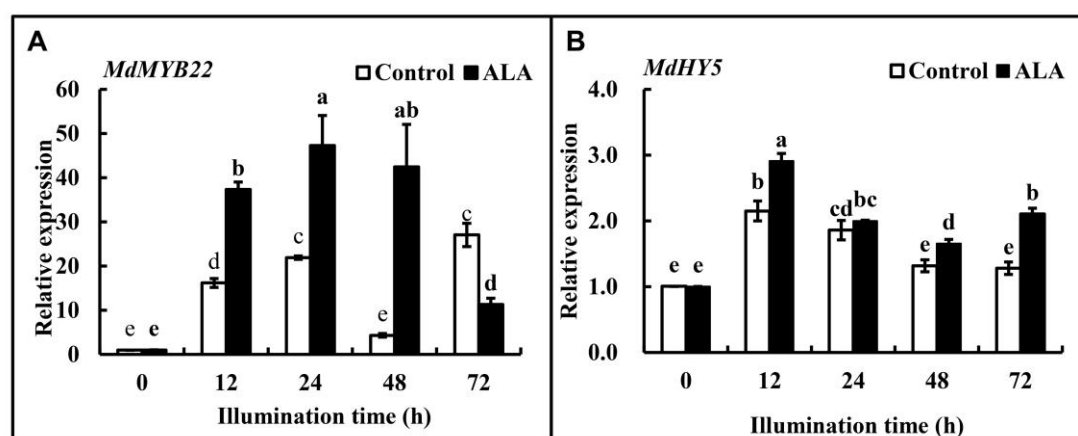

**Figure S2. Effect of ALA on *MdMYB22* and *MdHY5* gene expression in calli.** The calli were treated with 50 mg L<sup>-1</sup> ALA or deionized water (Control) for 3 h under dark and then cultured in solid MS medium under light of 100  $\mu\text{mol m}^{-2}\text{s}^{-1}$  photon flux density at 22°C for 72 h. The values of (A, B) were performed 3 biological replicates. Error bars represent standard errors. Three biological replicates were performed for each experiment. The same lowercase letters indicate no significant differences at  $P \leq 0.05$ .

**Table S1. Primer sequences used in the study**

|                      | Primer name           | Forward primer 5'-3'      | Reverse primer 5'-3'      |
|----------------------|-----------------------|---------------------------|---------------------------|
| CDS<br>amplification | <i>121-SCL8</i>       | GAGAACACGGGGGACTCTAGAATG  | GGACTGACCACCCGGGGATCCACG  |
|                      |                       | CAATCGGGAGGCTTCAACG       | CCAAGCGGAAGCGAC           |
|                      | <i>1300-SCL8</i>      | GAGAACACGGGGGACTCTAGAATG  | GCCCTTGCTCACCATGGATCCACGC |
|                      |                       | CAATCGGGAGGCTTC           | CAAGCGGAAGCGAC            |
|                      | <i>0800-MdFLS1</i>    | TCGACGGTATCGATAAGCTTTAGGT | GCTCTAGAACTAGTGGATCCTTCCA |
|                      |                       | GTGAAATTCTGTCTTTAGGACA    | CCGCTCTCATCTCTCTT         |
|                      | <i>proMdFLS1</i>      | GAGAACACGGGGGACTCTAGATAG  | GGACTGACCACCCGGGGATCCTTCC |
|                      |                       | GTGTGAAATTCTGTCTTTAGG     | ACCGCTCTCATCTCTC          |
|                      | <i>MdSCL8(i)</i>      | GGGGACAAGTTTGTACAAAAAAGC  | GGGGACCACTTTGTACAAGAAAGCT |
|                      |                       | AGGCTCCCACCAGCAGAACCCTAC  | GGGTGCTCTTGCAGCGTGTACTGA  |
|                      | <i>MdHY5(i)</i>       | GGGGACAAGTTTGTACAAAAAAGC  | GGGGACCACTTTGTACAAGAAAGCT |
|                      |                       | AGGCTTCTTCGAGCTCTGCATTCCA | GGGTAACAACCTCTTCAGCCGCTT  |
|                      | <i>MdMYB22(i)</i>     | GGGGACAAGTTTGTACAAAAAAGC  | GGGGACCACTTTGTACAAGAAAGCT |
|                      |                       | AGGCTTGAAATTAGCACCAGTGTCC | GGGTGGGACCTCCATTAGTAGCACG |
| qRT-PCR              | <i>MdUBQ</i>          | CTCCGTGGTGGTTTTTAAGT      | GGAGGCAGAAACAGTACCAT      |
|                      | <i>MdFLS1</i>         | AAAATGGGAGTGAGTCTGTG      | TTATGACCTCGTGGAATGT       |
|                      | <i>MdSCL8</i>         | CGTGGAAGATGTGAAGTGTT      | GCGGCTTATCCAACCAAA        |
|                      | <i>MdHY5</i>          | GGAAGAGTGCCGGAAATCG       | CTCCCTTGCTTGCTGTGCT       |
|                      | <i>MdMYB22</i>        | GTAATAGGTGGTCTTTGATAGCG   | GGGTTTGGTGGTAGAGTAGGT     |
| Y2H/<br>Y1H          | <i>BD-MdHY5</i>       | ATGGCCATGGAGGCCGAATTCATGC | CCGCTGCAGGTCGACGGATCCATCC |
|                      |                       | AAGAGCAGGCGACG            | GCATTTGCACCACCA           |
|                      | <i>AD-MdMYB22</i>     | GCCATGGAGGCCAGTGAATTCATGG | CAGCTCGAGCTCGATGGATCCCTGG |
|                      |                       | GGAGGGCGCCGTGC            | ATGCCGTAGTAAGTCGTGC       |
|                      | <i>AD-MdHY5</i>       | GCCATGGAGGCCAGTGAATTCATGC | CAGCTCGAGCTCGATGGATCCATCC |
|                      |                       | AAGAGCAGGCGACG            | GCATTTGCACCACCA           |
|                      | <i>BD-MdSCL8</i>      | ATGGCCATGGAGGCCGAATTCATGC | CCGCTGCAGGTCGACGGATCCACGC |
|                      |                       | AATCGGGAGGCTTCA           | CAAGCGGAAGCGAC            |
|                      | <i>AD-MdSCL8</i>      | GTGGGCATCGATACGGGATCCATGC | ACGATTCATCTGCAGCTCGAGACGC |
|                      |                       | AATCGGGAGGCTTCA           | CAAGCGGAAGCGAC            |
|                      | <i>proMdFLS-pAbAi</i> | AAATGATGAATTGAAAAGCTTTAGG | ATACAGAGCACATGCCTCGAGTTCC |
|                      |                       | TGTGAAATTCTGTCTTTAGGACA   | ACCGCTCTCATCTCTCTT        |
| BIFC                 | <i>YNE-MdHY5</i>      | GAGAACACGGGGGACTCTAGAATG  | CTCCATCCCGGGAGCGGTACCATCC |
|                      |                       | CAAGAGCAGGCGACG           | GCATTTGCACCACCA           |
|                      | <i>YNE-MdSCL8</i>     | GAGAACACGGGGGACTCTAGAATG  | CTCCATCCCGGGAGCGGTACCACGC |
|                      |                       | CAATCGGGAGGCTTCA          | CAAGCGGAAGCGAC            |

|            |                     |                           |                           |
|------------|---------------------|---------------------------|---------------------------|
| Luciferase | <i>YCE-MdMYB22</i>  | GAGAACACGGGGGACTCTAGAATG  | GTACATCCCGGGAGCGGTACCCTGG |
|            |                     | GGGAGGGCGCCGTGC           | ATGCCGTAGTAAGTCGTCG       |
|            | <i>YCE-MdSCL8</i>   | GAGAACACGGGGGACTCTAGAATG  | GTACATCCCGGGAGCGGTACCACGC |
|            |                     | CAATCGGGAGGCTTCA          | CAAGCGGAAGCGAC            |
|            | <i>NLUC-MdHY5</i>   | GAGCTCGGTACCCGGGGATCCATGC | CGCGTACGAGATCTGGTCGACATCC |
|            |                     | AAGAGCAGGCGACG            | GCATTTGCACCACCA           |
|            | <i>CLUC-MdMYB22</i> | TACGCGTCCCGGGGCGGTACCATGG | TGTAGTCCATTGTTGGATCCCTGG  |
|            |                     | GGAGGGCGCCGTGC            | ATGCCGTAGTAAGTCGTCG       |
|            | <i>NLUC-MdSCL8</i>  | GAGCTCGGTACCCGGGGATCCATGC | CGCGTACGAGATCTGGTCGACACGC |
|            |                     | AATCGGGAGGCTTCA           | CAAGCGGAAGCGAC            |
|            | <i>CLUC-MdSCL8</i>  | TACGCGTCCCGGGGCGGTACCATGC | TGTAGTCCATTGTTGGATCCCGCC  |
|            |                     | AATCGGGAGGCTTCA           | AAGCGGAAGCGAC             |
